# Supplementary material for: Comparison of Audiovisual and Paper-Based Materials for 1-Time Informed Consent for Research in Prison: A Randomized Clinical Trial
Source: PubMed Central journal article supplement (PMC9554696; doi:10.1001/jamanetworkopen.2022.35888), 2022-10-11
Supplement: jamanetwopen-e2235888-s003.pdf [file jamanetwopen-e2235888-s003.pdf]

## Data Sharing Statement

Baggio. Comparison of Audiovisual and Paper-Based Materials for 1-Time Informed Consent for Research in Prison. *JAMA Netw Open*. Published October 11, 2022.

doi:10.1001/jamanetworkopen.2022.35888

### Data

**Data available:** No

### Additional Information

**Explanation for why data not available:** The datasets generated and/or analysed during the current study are not publicly available due their sensitive nature (detained persons) but are available from the corresponding author on reasonable request.
